# Supplementary material
Source: publisher figshare collection journal article supplement (https://asha.figshare.com/articles/dataset/_/20452575)
Supplement: Supplementary file 1 [file 1]

**Supplemental Material S2.** Regression model output when child language is treated as a continuous variable.

Regression Models

| Model                          | <i>B</i> | 95% CI for <i>B</i> | <i>SE B</i> | $\beta$ | <i>p</i> | <i>F</i> | <i>Adj. R</i> <sup>2</sup> |
|--------------------------------|----------|---------------------|-------------|---------|----------|----------|----------------------------|
| <b>Single Verbal-Only</b>      |          |                     |             |         | .025*    | 4.23     | .20                        |
| Intercept                      | -1.69    | [-8.80, 5.43]       | 3.45        |         | .629     |          |                            |
| Marital Status                 | 2.93     | [0.15, 5.70]        | 1.34        | .38     | .040*    |          |                            |
| Child Language                 | 0.07     | [-0.01, 0.15]       | 0.04        | .30     | .103     |          |                            |
| <b>Single Verbal-Nonverbal</b> |          |                     |             |         | .006**   | 4.49     | .40                        |
| Intercept                      | 11.75    | [3.54, 19.97]       | 3.95        |         | .007**   |          |                            |
| Language to Child-E            | -2.16    | [-6.15, 1.82]       | 1.91        |         | .271     |          |                            |
| Language to Child-S            | 2.38     | [-1.97, 6.74]       | 2.09        |         | .267     |          |                            |
| Caregiver Age                  | -0.13    | [0.26, 0.00]        | 0.06        |         | .057.    |          |                            |
| Child Sex                      | -3.08    | [-5.64, -0.52]      | 1.23        |         | .021*    |          |                            |
| Child Language                 | 0.14     | [0.06, 0.22]        | 0.04        |         | .002**   |          |                            |
| <b>Multiturn Episodes</b>      |          |                     |             |         | .013*    | 5.22     | .24                        |
| Intercept                      | 1.10     | [-2.72, 4.92]       | 1.85        |         | .559     |          |                            |
| Child Sex                      | -1.74    | [-3.22, -0.26]      | 0.72        | -.44    | .023*    |          |                            |
| Child Language                 | 0.06     | [0.02, 0.11]        | 0.02        | .50     | .010*    |          |                            |
