# Supplementary material
Source: publisher figshare collection journal article supplement (https://asha.figshare.com/articles/dataset/_/20452575)
Supplement: Supplementary file 3 [file 1]

**Supplemental Material S1.** Individual data related to language and literacy background of caregiver and child, by child language group.

|              | Race and Ethnicity     | Caregiver's country of origin (years in U.S.) | Caregiver's most common language spoken... |     | Other languages spoken at home | Language caregiver speaks to child | Other languages child is exposed to (context, %) | Language child speaks | Frequency reading with child (min. per week) | Caregiver difficulty reading English:<br>1-Receipts<br>2-Food labels<br>3-Medication directions<br>4-Newspapers |
|--------------|------------------------|-----------------------------------------------|--------------------------------------------|-----|--------------------------------|------------------------------------|--------------------------------------------------|-----------------------|----------------------------------------------|-----------------------------------------------------------------------------------------------------------------|
|              |                        |                                               | growing up                                 | now |                                |                                    |                                                  |                       |                                              |                                                                                                                 |
| 104          | Non-White Hispanic     | USA                                           | E                                          | S   | NA                             | Mostly S, some E                   | S (Home, 75%)                                    | Mostly S, some E*     | 20                                           | No                                                                                                              |
| 106          | White                  | USA                                           | E                                          | E   | NA                             | E only                             | NA                                               | E only                | 35                                           | No                                                                                                              |
| 107          | African American       | USA                                           | E                                          | E   | NA                             | E only                             | NA                                               | E only                | 140                                          | No                                                                                                              |
| 108          | Non-White Hispanic     | Puerto Rico (10)                              | S                                          | S   | E                              | S only                             | S (Home, 90%)                                    | S only*               | 280                                          | Yes                                                                                                             |
| 109          | Non-White Hispanic     | USA                                           | S                                          | E   | S                              | E only                             | S (Home, 10%)                                    | E only*               | 0                                            | No                                                                                                              |
| LOW LANGUAGE | 113 Non-White Hispanic | Puerto Rico (36)                              | S                                          | S   | NA                             | Half E, half S                     | S (Home, 50%)                                    | Half E, half S*       | 420                                          | No                                                                                                              |
|              | 114 Non-White Hispanic | Puerto Rico (38)                              | S                                          | E   | S                              | Mostly S, some E                   | S (Home, 70%)                                    | Half E, half S*       | 53                                           | No                                                                                                              |
|              | 115 Non-White Hispanic | Puerto Rico (3)                               | S                                          | S   | E                              | Mostly S, some E                   | S (Home, 75%)                                    | Half E, half S*       | 210                                          | No                                                                                                              |
|              | 117 Non-White Hispanic | Mexico (18)                                   | S                                          | S   | E                              | Mostly S, some E                   | S (Home, neighborhood, 70%)                      | Half E, half S*       | 35                                           | No (1-3), Sometimes (4)                                                                                         |
| 120          | Other                  | USA                                           | Half E, half S                             | E   | ASL                            | E only                             | S (Home, neighborhood, 25%)                      | E only                | 0                                            | No                                                                                                              |
| 138          | African American       | USA                                           | E                                          | E   | NA                             | E only                             | NA                                               | E only                | 10                                           | No                                                                                                              |
| 145          | White                  | USA                                           | E                                          | E   | German, French, S (TV)         | E only                             | German, French, S (TV, 5%)                       | E only                | 210                                          | No                                                                                                              |

|     | Race and Ethnicity | Caregiver's country of origin (years in U.S.) | Caregiver's most common language spoken... |                | Other languages spoken at home | Language caregiver speaks to child | Other languages child is exposed to (context, %) | Language child speaks | Frequency reading with child (min. per week) | Caregiver difficulty reading English:<br>1-Receipts<br>2-Food labels<br>3-Medication directions<br>4-Newspapers |
|-----|--------------------|-----------------------------------------------|--------------------------------------------|----------------|--------------------------------|------------------------------------|--------------------------------------------------|-----------------------|----------------------------------------------|-----------------------------------------------------------------------------------------------------------------|
|     |                    |                                               | growing up                                 | now            |                                |                                    |                                                  |                       |                                              |                                                                                                                 |
| 101 | African American   | USA                                           | E                                          | E              | NA                             | E only                             | NA                                               | E only                | 35                                           | No                                                                                                              |
| 102 | African American   | USA                                           | E                                          | E              | S                              | E only                             | S (Home, 2%)                                     | E only                | 35                                           | No (1,2,4), Sometimes (3)                                                                                       |
| 103 | African American   | USA                                           | E                                          | E              | NA                             | E only                             | NA                                               | E only                | 3.5 episodes                                 | No                                                                                                              |
| 105 | Non-White Hispanic | USA                                           | Half E, half S                             | Half E, half S | NA                             | Half E, half S                     | S (Home, 50%)                                    | E only*               | 60                                           | No (1-3), Sometimes (4)                                                                                         |
| 111 | African American   | USA                                           | E                                          | E              | NA                             | E only                             | NA                                               | E only                | 210                                          | No                                                                                                              |
| 118 | African American   | USA                                           | E                                          | E              | NA                             | E only                             | NA                                               | E only                | 123                                          | No                                                                                                              |
| 122 | African American   | USA                                           | E                                          | E              | NA                             | E only                             | NA                                               | E only                | 2                                            | No                                                                                                              |
| 124 | African American   | USA                                           | E                                          | E              | Jamaican Patois                | E only                             | S (Home, family friends, 50%)                    | E only                | 20                                           | No                                                                                                              |
| 126 | African American   | USA                                           | E                                          | E              | NA                             | E only                             | NA                                               | E only                | 88                                           | No                                                                                                              |
| 128 | Non-White Hispanic | Costa Rica (15)                               | -                                          | Half E, half S | NA                             | Mostly S, some E                   | S (Home, church, 50%)                            | Half E, half S*       | 35                                           | No                                                                                                              |
| 131 | African American   | USA                                           | E                                          | E              | NA                             | E only                             | NA                                               | E only                | 210                                          | No                                                                                                              |
| 132 | Non-White Hispanic | Mexico (17)                                   | S                                          | S              | E                              | Mostly S, some E                   | S (Home, 75%)                                    | S only*               | 20                                           | No                                                                                                              |
| 133 | Non-White Hispanic | Peru (17)                                     | S                                          | S              | NA                             | Mostly S, some E                   | S (Home, 85%)                                    | Mostly S, some E*     | 525                                          | No                                                                                                              |
| 134 | Non-White Hispanic | Mexico (NR)                                   | S                                          | S              | NA                             | S only                             | S (Home, 100%)                                   | S only*               | 131                                          | No (1,2), Yes (3) Sometimes (4)                                                                                 |
| 135 | Non-White Hispanic | Mexico (12)                                   | S                                          | E              | S                              | Half E, half S                     | S (Home, 50%)                                    | E only*               | 280                                          | No                                                                                                              |

Notes. E = English, S = Spanish. \* denotes child language was assessed using Spanish PLS-5.
